# Supplementary material
Source: PubMed Central journal article supplement (PMC11063930)
Supplement: NIHMS1981650-supplement-Supporting_Information.pdf [file NIHMS1981650-supplement-Supporting_Information.pdf]

## Supplemental Information

### Expression of SARS-CoV-2 Nonstructural Proteins 3 and 4 can tune the Unfolded Protein Response in cell culture

Jonathan P. Davies<sup>†1</sup>, Athira Sivadas<sup>†1</sup>, Katherine R. Keller<sup>2</sup>, Brynn K. Roman<sup>1</sup>, Richard J.H. Wojcikiewicz<sup>2</sup>, Lars Plate<sup>\*1,3,4</sup>

<sup>1</sup>Department of Biological Sciences, Vanderbilt University, Nashville, TN 37232, United States

<sup>2</sup>Department of Pharmacology, SUNY Upstate Medical University, Syracuse, NY 12310, United States

<sup>3</sup>Department of Chemistry, Vanderbilt University, Nashville, TN 37240, United States

<sup>4</sup>Department of Pathology, Microbiology and Immunology, Vanderbilt University Medical Center, Nashville, TN 37240, United States

†Contributed equally

\*Corresponding author:

Lars Plate  
Vanderbilt University  
Nashville, TN 37240  
Email: lars.plate@vanderbilt.edu  
Phone: (615)-343-3405

## Supplemental Figures

**Supplemental Figure S1.** Western blot analysis of HEK293T cells transfected with specified viral proteins or Tdtomato as basal control.

**Supplemental Figure S2.** Western blot analysis of HEK293T cells transfected with specified viral proteins and blotted for CHOP and BiP.

**Supplemental Figure S3.** Effect of PERK inhibition on ATF4 upregulation mediated by nsp4.

**Supplemental Figure S4.** TMT abundances of proteins identified by mass spectrometry in this study.

**Supplemental Figure S5.** Waterfall plot of proteome in HEK293T cells expressing SARS-CoV-2 nsp4-ST vs GFP control.

**Supplemental Figure S6.** Normalized TMT abundance levels of individual UPR pathway protein markers in HEK293T cells expressing various viral proteins.

**Supplemental Figure S7.** ATF6 marker enrichment for with treatment of Tm, 147, or nsp4-ST expression.

**Supplemental Figure S8.** Effect of various multi-pass transmembrane proteins on the UPR as compared to nsp4.

**Supplemental Figure S9.** Global proteome analysis of A549 cells expressing SARS-CoV-2 nsp4-FT vs GFP control.

**Supplemental Figure S10.** Normalized TMT abundance levels of individual UPR pathway protein markers in A549 cells expressing nsp4-FT or treated with Tm.

**Supplemental Figure S11.** Western blot analysis of HEK293T cells transfected with specified viral proteins and blotted for ATF6 protein markers.

**Supplemental Figure S12.** Upregulation of IRE/XBP1s proteomics protein markers.

**Supplemental Figure S13.** Viral protein abundance levels when expressed in HEK293T cells.

### **Supplemental Tables**

**Table S1.** UPR pathway protein sets used for proteomics analysis (XLSX)

**Table S2.** Mass spectrometry protein data of HEK293T cells (XLSX)

**Table S3.** Mass spectrometry peptide data of HEK293T cells (XLSX)

**Table S4.** Mass spectrometry protein data of transmembrane protein panel (XLSX)

**Table S5.** Mass spectrometry peptide data of transmembrane protein panel (XLSX)

**Table S6.** Mass spectrometry protein data of A549 cells (XLSX)

**Table S7.** Mass spectrometry peptide data of A549 cells (XLSX)

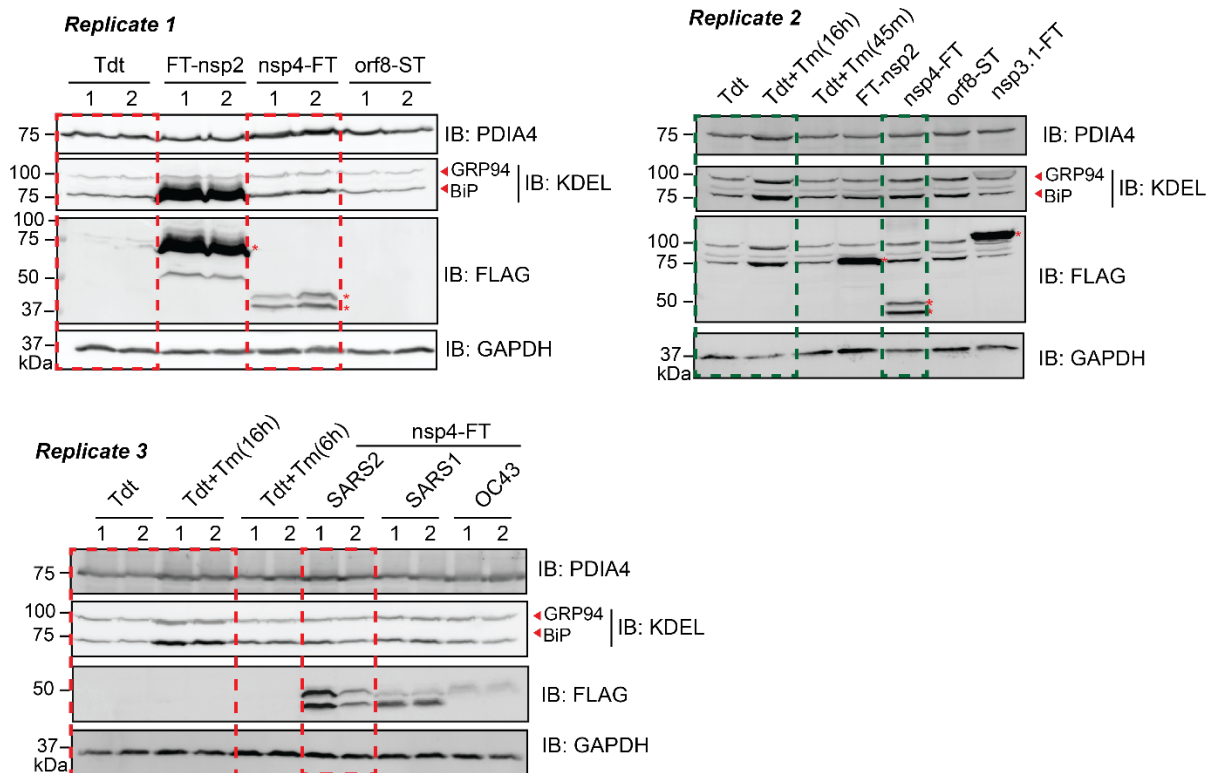

**Figure S1. Western blot analysis of HEK293T cells transfected with specified viral proteins or Tdtomato as basal control.** Tm treatment was used as a positive control. Green boxed lanes were shown for **Fig. 1c**. Green and red boxed lanes were quantified for **Fig. 1d**. Red asterisks indicate viral proteins. Tdt, tdTomato; Tm, Tunicamycin (1  $\mu$ g/mL); FT, FLAG-Tag; ST, StrepTag. Corresponding full blots are shown below.

Supplementary Fig.S1 - Replicate 1, Full blots

IB: PDIA4, low contrast

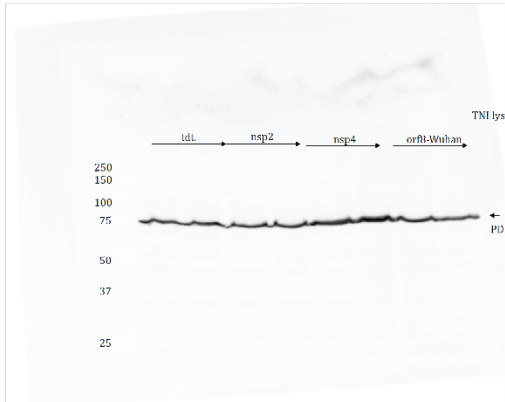

IB: PDIA4, high contrast

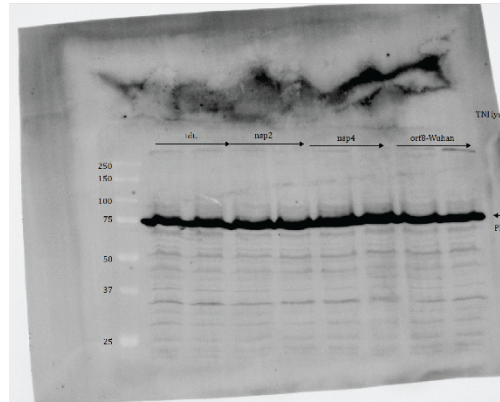

IB: FLAG

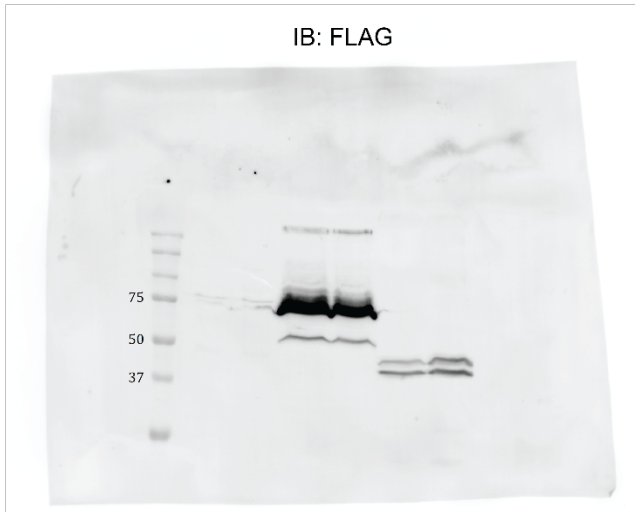

IB: KDEL

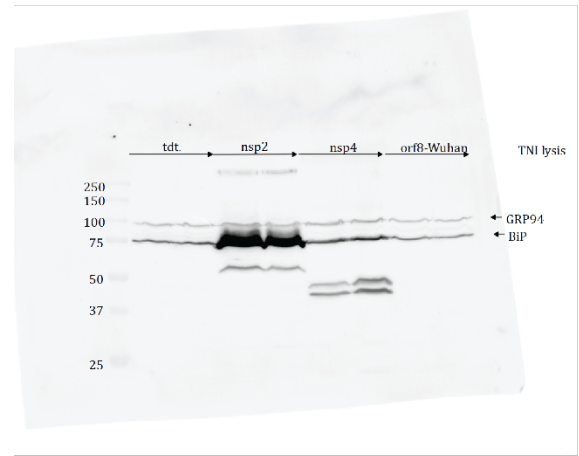

IB: GAPDH

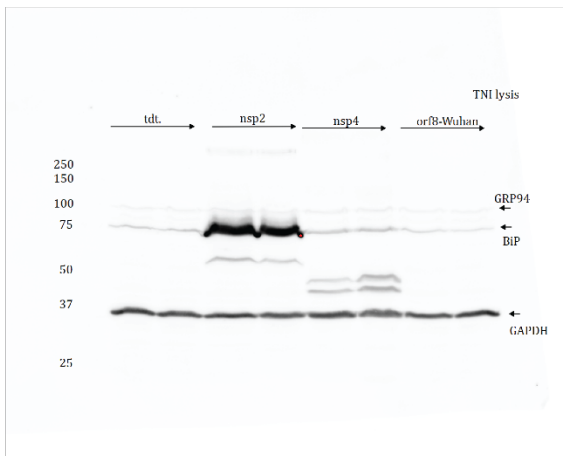

Supplementary Fig.S1 - Replicate 2, Full blots

IB: PDIA4

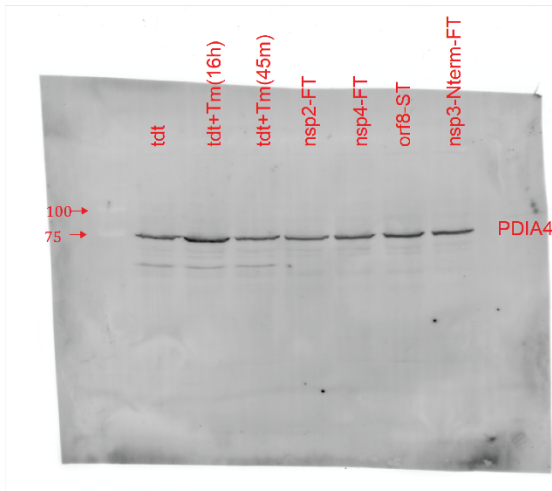

IB: FLAG

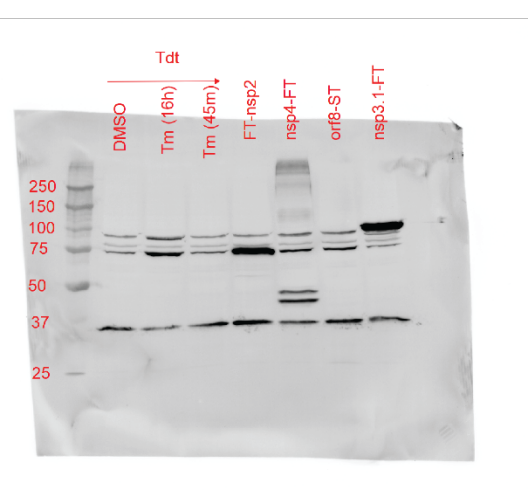

IB: KDEL

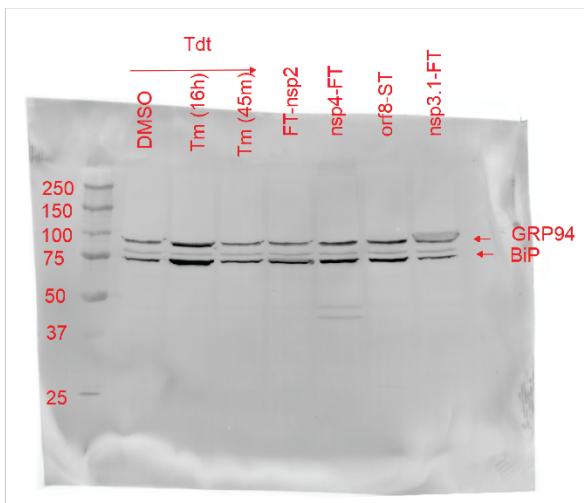

IB: GAPDH

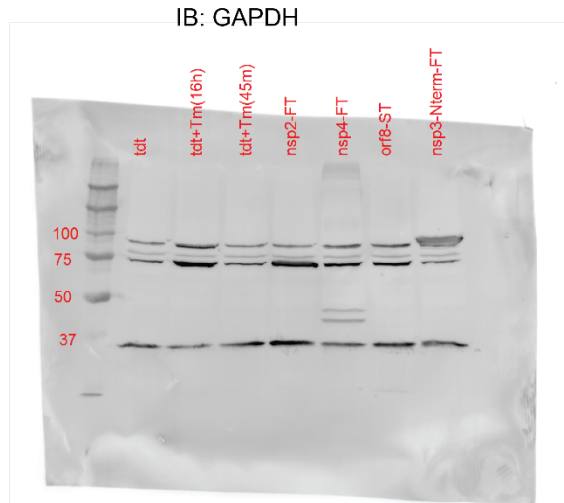

Supplementary Fig.S1 - Replicate 3, Full blots

IB: PDIA4

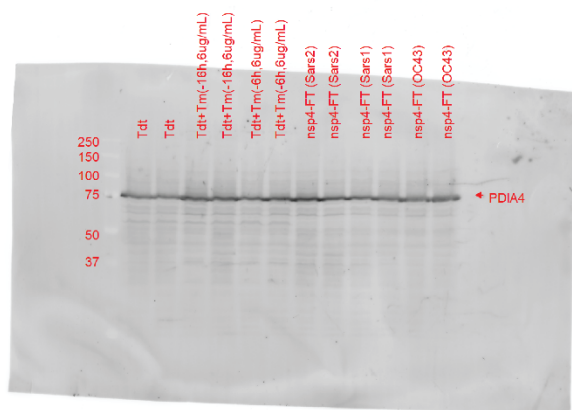

IB: FLAG

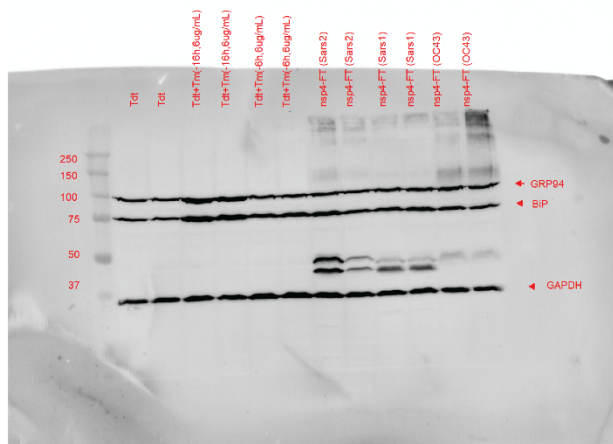

IB: KDEL

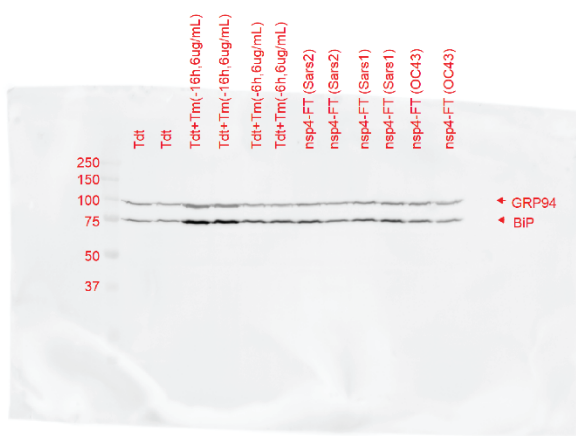

IB: GAPDH

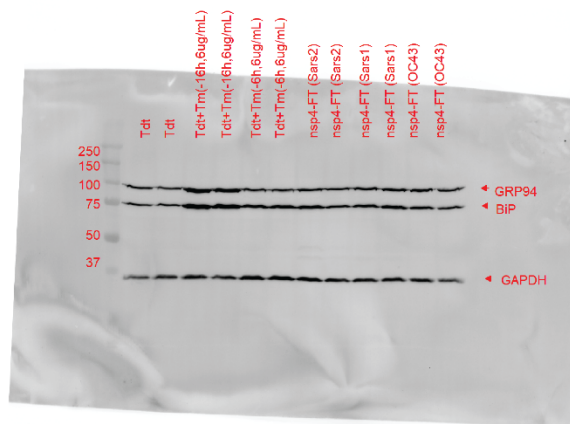

### Replicate 1

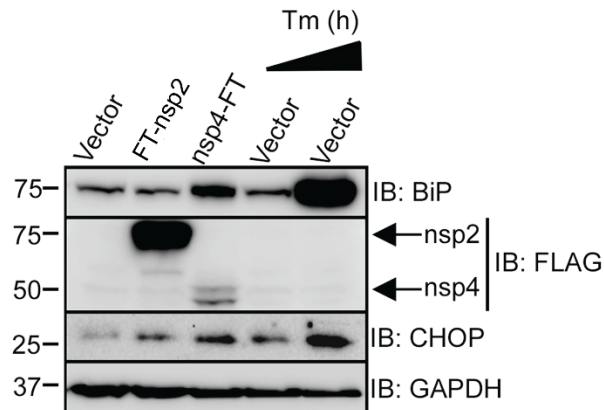

### Replicate 2

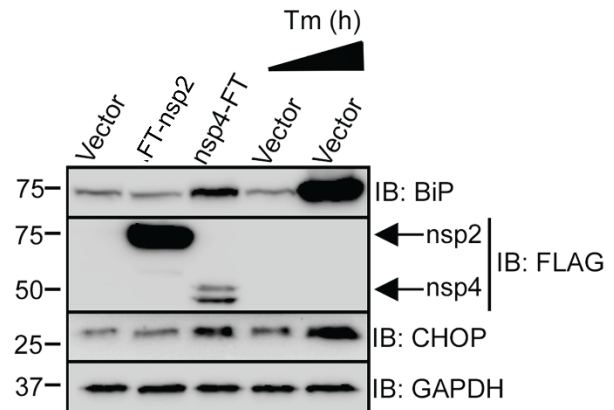

### Replicate 3

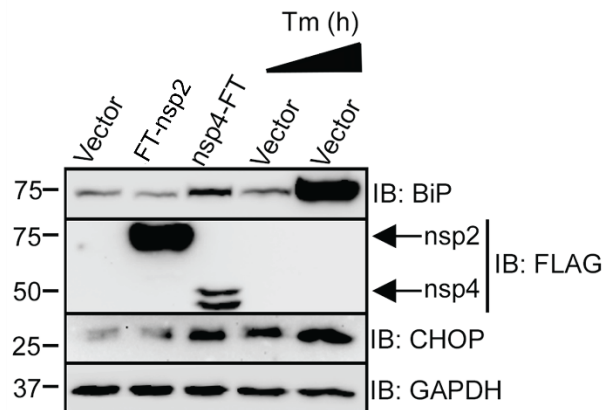

**Figure S2.** Blots quantified for **Fig. 1f**. Replicate 2 blot was shown in **Fig. 1e**. WT-HEK293T cells were transfected with empty vector or SARS-CoV-2 FT-nsp2 or nsp4-FT, with control vector samples treated for 4 or 20 h Tunicamycin (5  $\mu$ g/mL). Western blotting for M2-FLAG, BiP, and CHOP shows marked upregulation of BiP and CHOP in nsp4-FT expressing cells. Corresponding full blots are shown below.

Supplemental Fig. S2, Replicate 1 Full blots

# Replicate 1

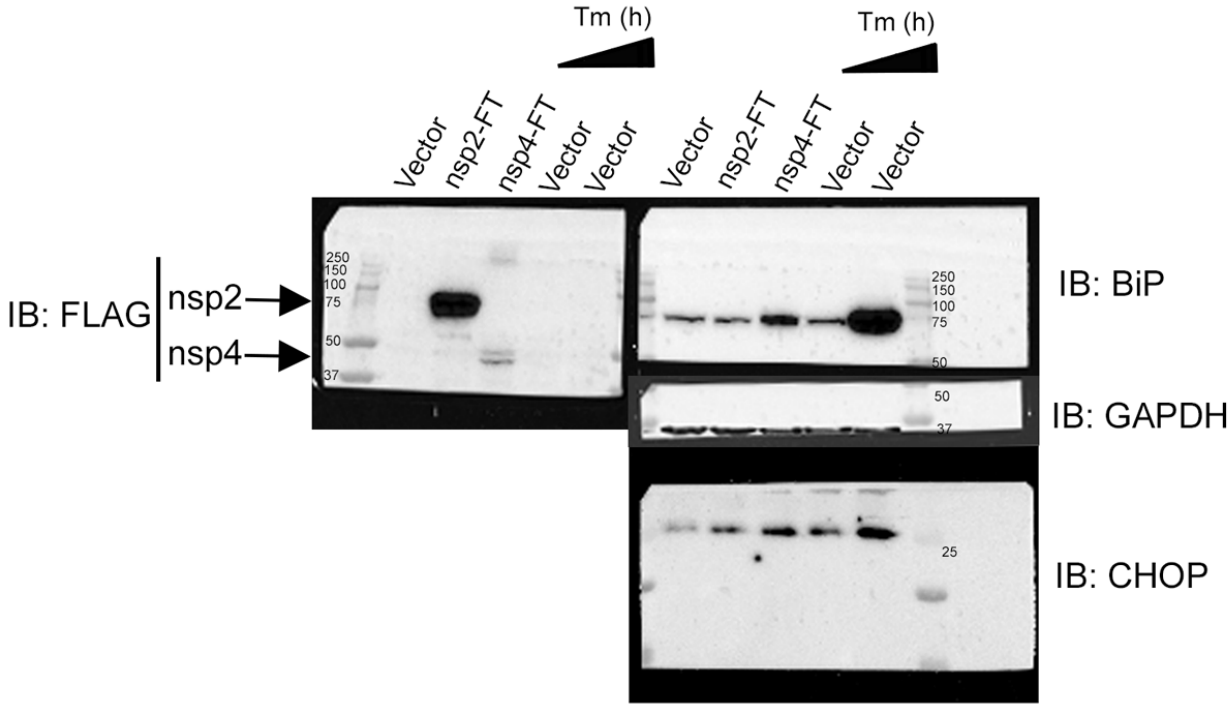



Supplemental Fig. S2, Replicate 2 Full blots

# Replicate 2

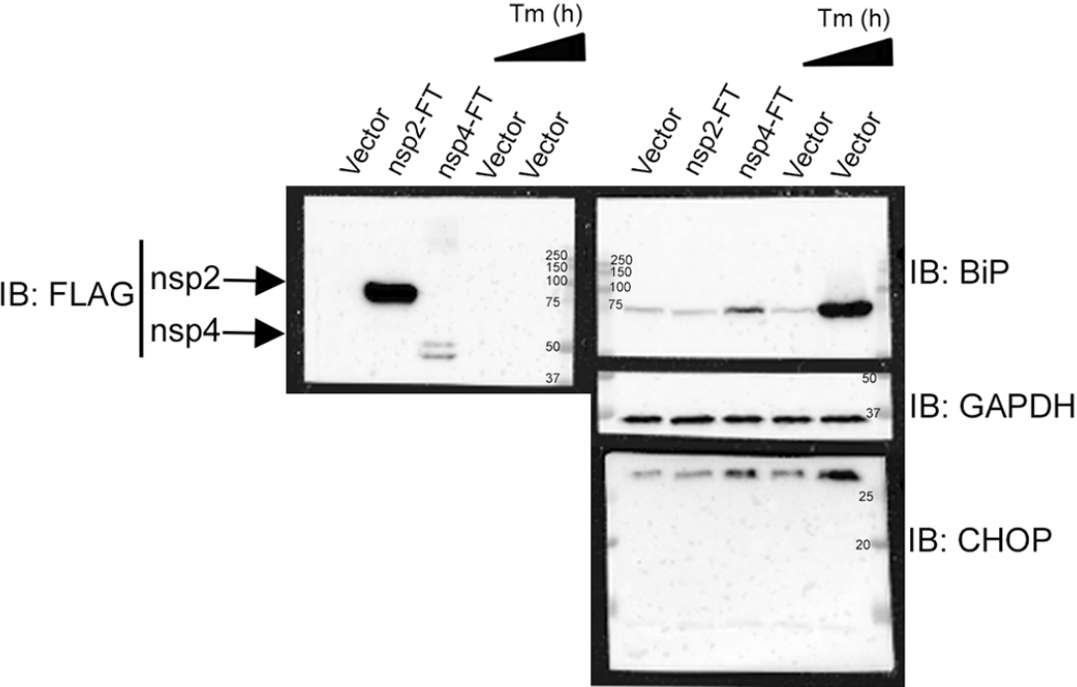

Supplemental Fig. S2, Replicate 3 Full blots

# Replicate 3

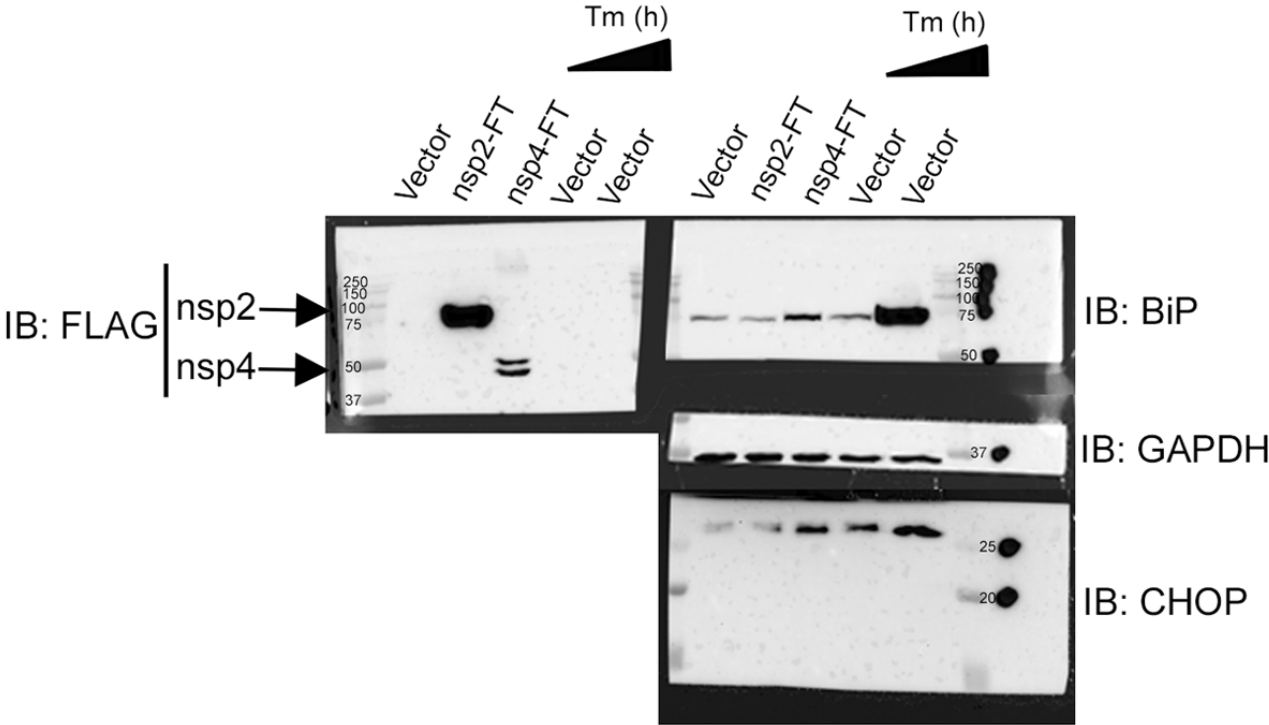

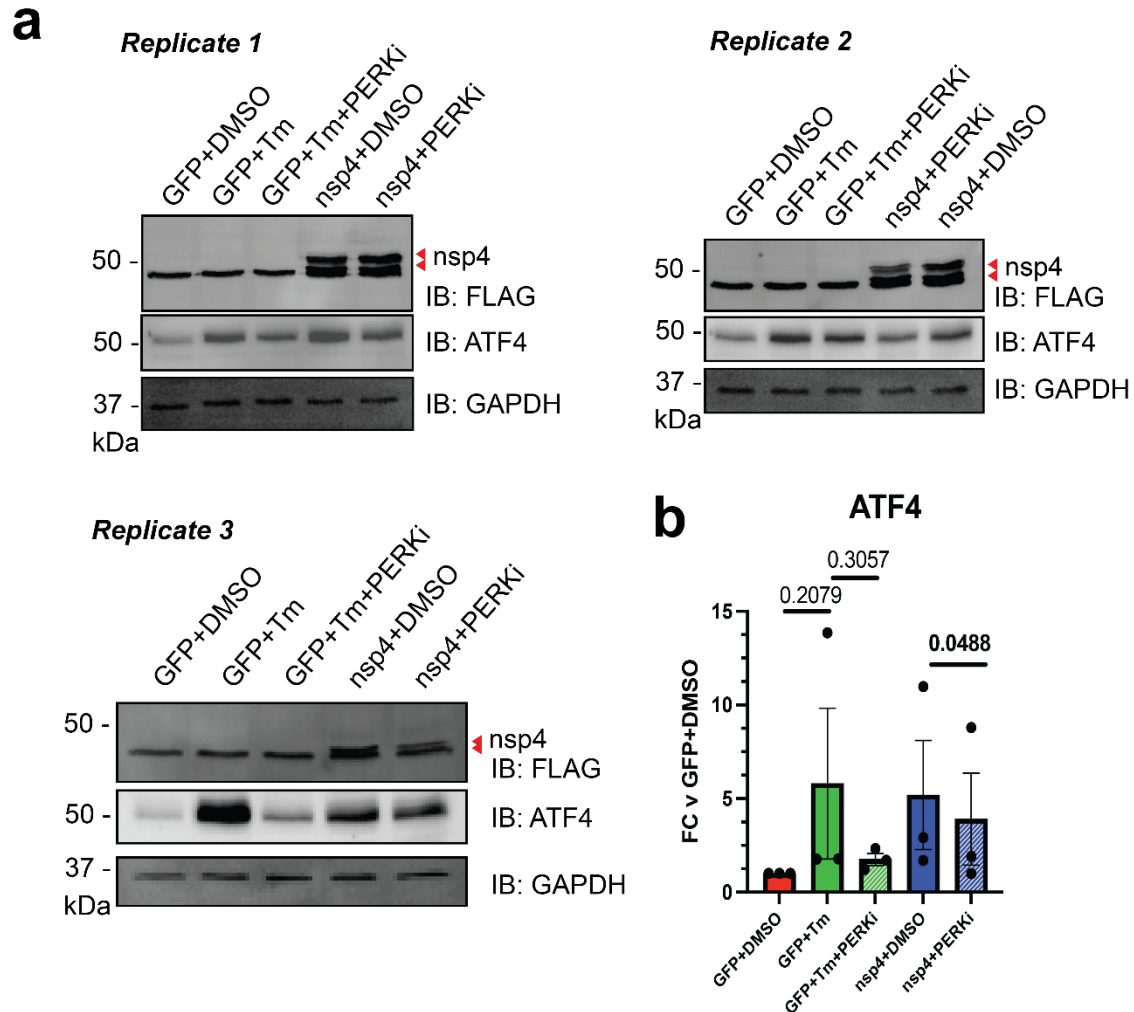

**Figure S3. Effect of PERK inhibition on ATF4 upregulation mediated by nsp4.**

HEK293T cells were transfected with GFP or SARS-CoV-2 nsp4-FT, with GFP samples treated with either Tunicamycin (Tm, 1  $\mu$ M) or Tunicamycin and PERK inhibitor II GSK2656157 (PERKi, 1  $\mu$ M) for 16h and nsp4-FT samples treated with PERK inhibitor II GSK2656157 (PERKi, 1  $\mu$ M) for 36h.

- a)** Western blots were probed for FLAG, ATF4, and GAPDH. Corresponding full blots are shown below.
- b)** Quantification of Western blots in **(a)**, normalized to GAPDH band intensities and relative to basal control (GFP+DMSO).  $n = 3$ , mean  $\pm$  SEM. Paired T-test was used to test significance,  $p < 0.05$  considered statistically significant.

**Supplemental Fig. S3 - Replicate 1, Full Blots**

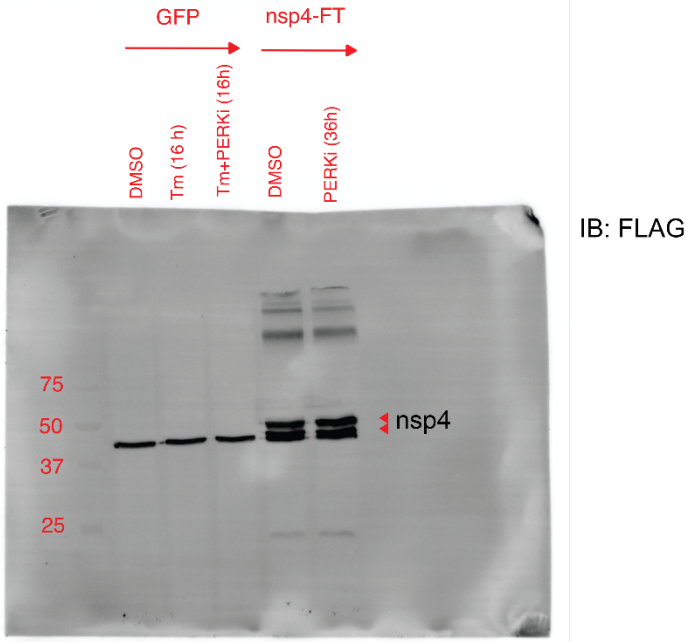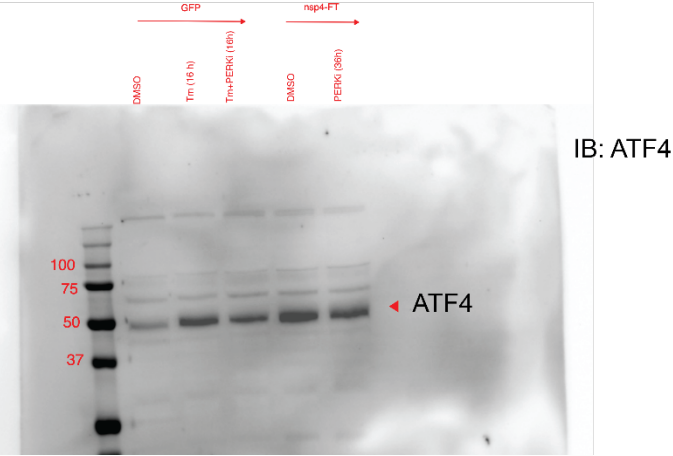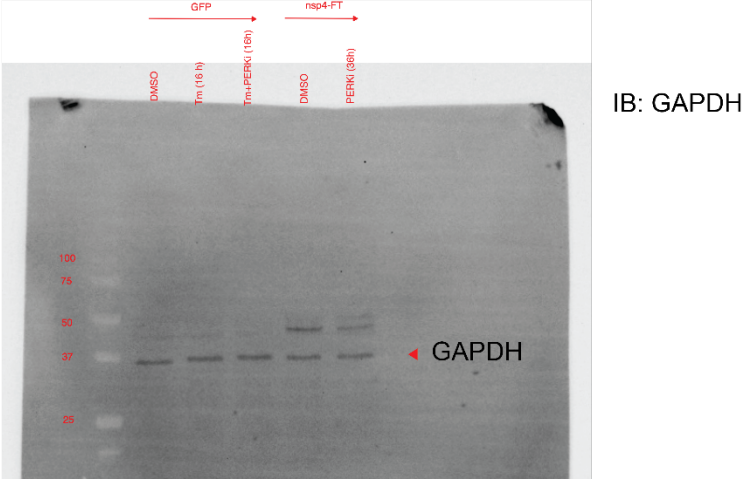

**Supplemental Fig. S3 - Replicate 2, Full Blots**

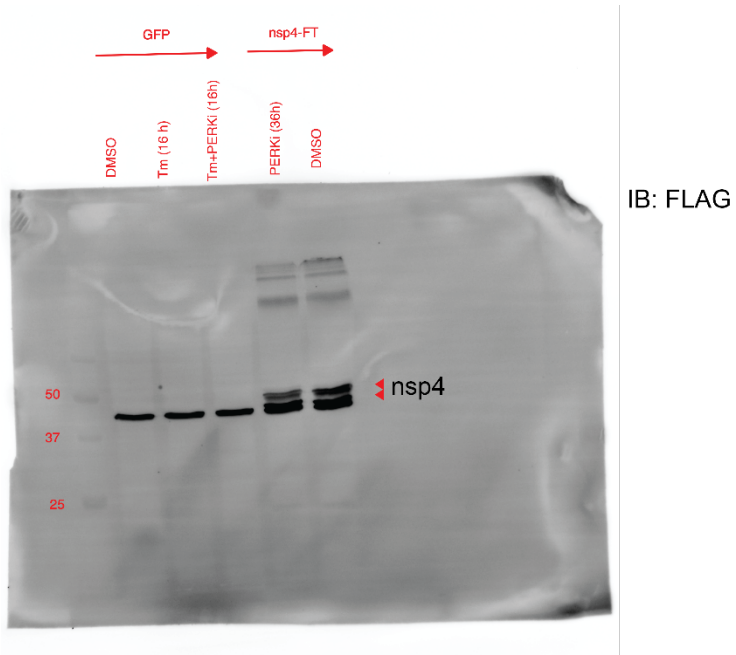

IB: FLAG

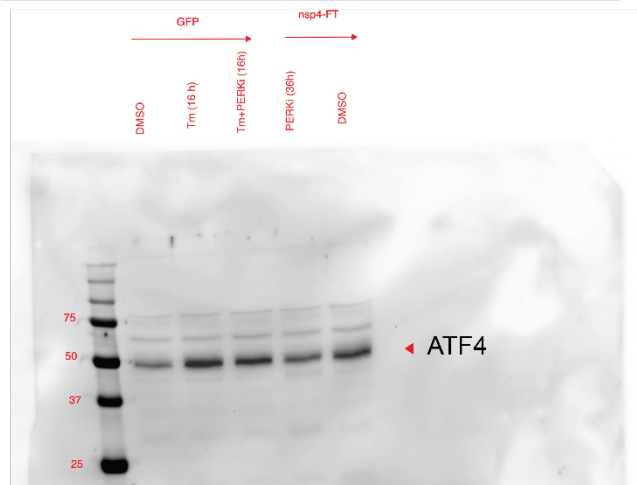

IB: ATF4

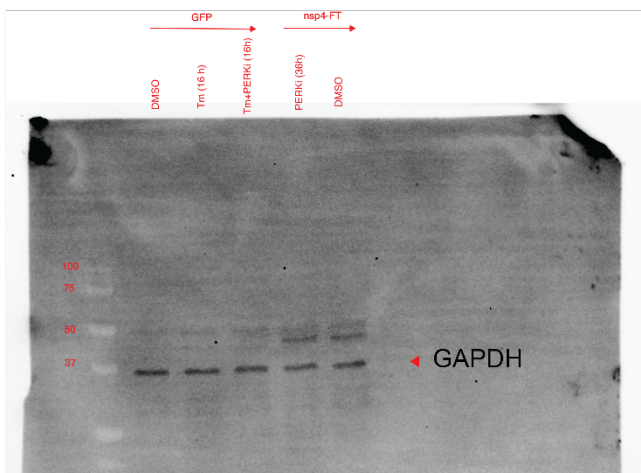

IB: GAPDH

Supplemental Fig. S3 - Replicate 3, Full Blots

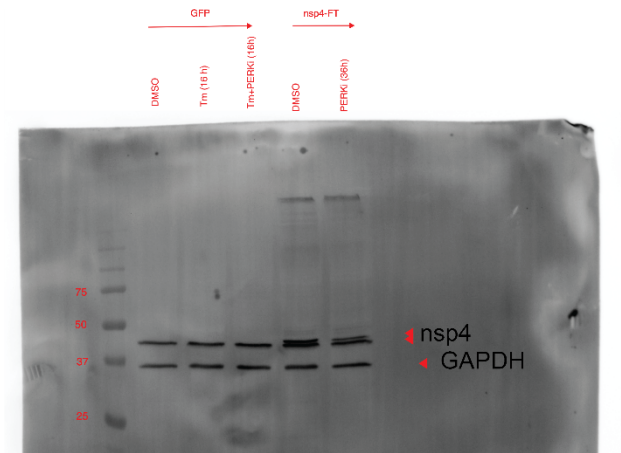

IB: FLAG  
IB: GAPDH

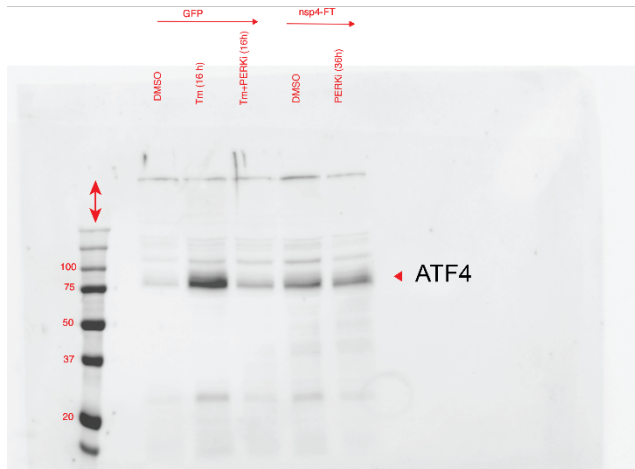

IB: ATF4

Note: Ladder was imaged separately and shifted down erroneously as indicated by the red arrow.

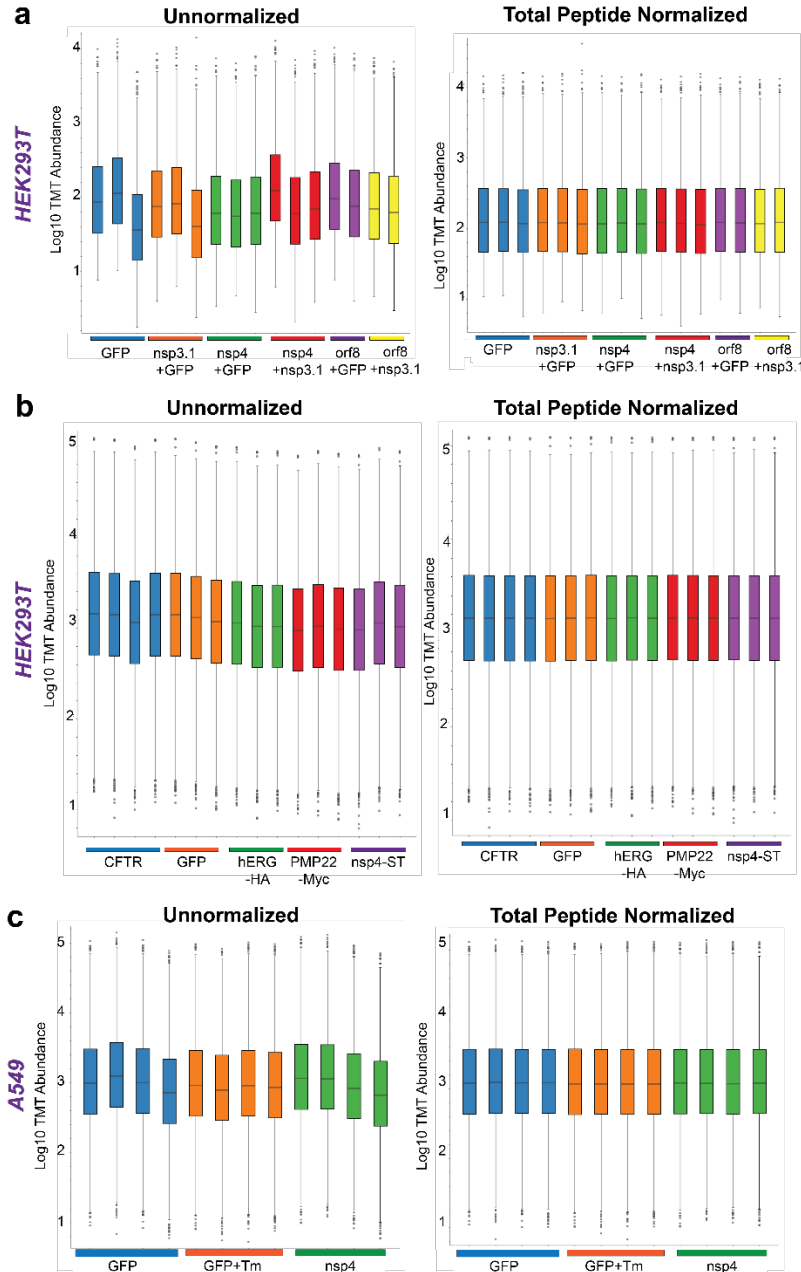

**Figure S4.** HEK293T (a,b) or A549 (c) cells were transfected with GFP (basal control) or corresponding proteins, lysates harvested and lysed at 40 h post-transfection, labeled with TMTpro isobaric labels, and analyzed by tandem mass spectrometry (LC/MS-MS). Identified proteins were normalized by total peptide amount.

- Unnormalized and normalized log<sub>10</sub> TMT abundances for MS experiment analyzing HEK293T UPR, corresponding to **Fig. 2,3**. See **Supplemental Tables S2, S3**.
- Unnormalized and normalized log<sub>10</sub> TMT abundances for HEK293T cells expressing transmembrane protein panel, corresponding to **Supplemental Fig. S8**. See **Supplemental Tables S4, S5**.
- Unnormalized and normalized log<sub>10</sub> TMT abundances for MS experiment analyzing A549 UPR, corresponding to **Fig. 2**. See **Supplemental Tables S6, S7**.

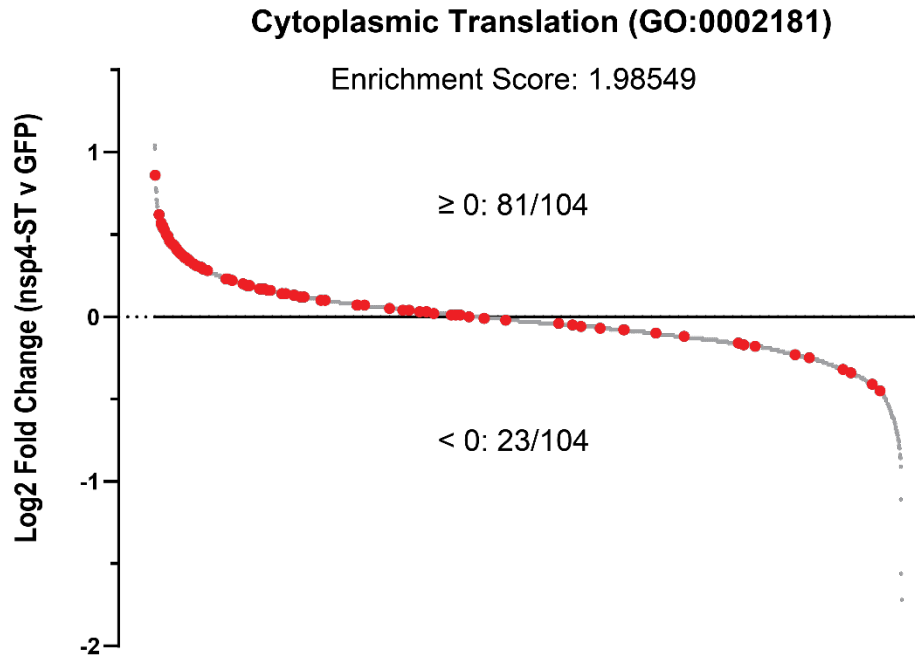

**Figure S5. Waterfall plot of proteome in HEK293T cells expressing SARS-CoV-2 nsp4-ST vs GFP control (corresponding to Fig. 2).**

A ranked list enrichment analysis was applied to identified proteins based on Log<sub>2</sub> Fold Change (nsp4-ST vs GFP) (using the STRING database<sup>1</sup>). Only one Gene Ontology (GO) Biological Processes term was significantly enriched (Cytoplasmic Translation, GO:0002181), with 81/104 genes having a positive Log<sub>2</sub> Fold Change and 23/104 genes having a negative Log<sub>2</sub> Fold Change. Proteins within the Cytoplasmic Translation GO Term are highlighted in red.



## ATF6

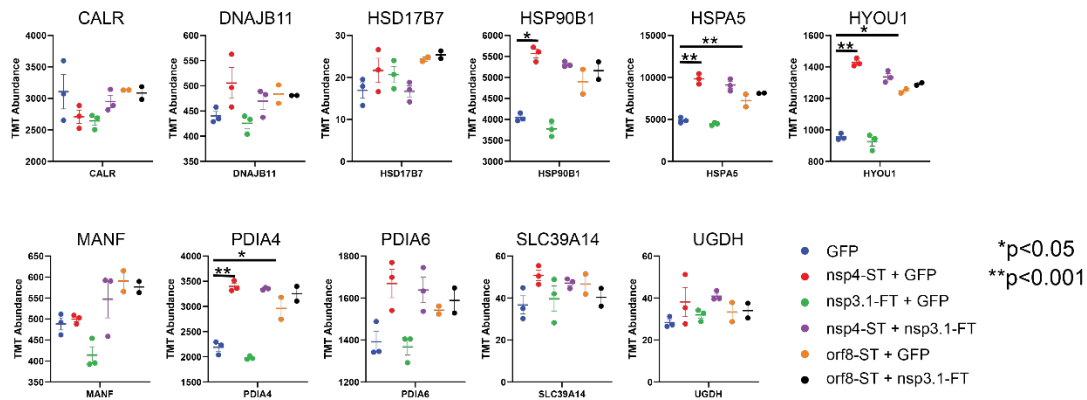

## XBP1s/IRE1

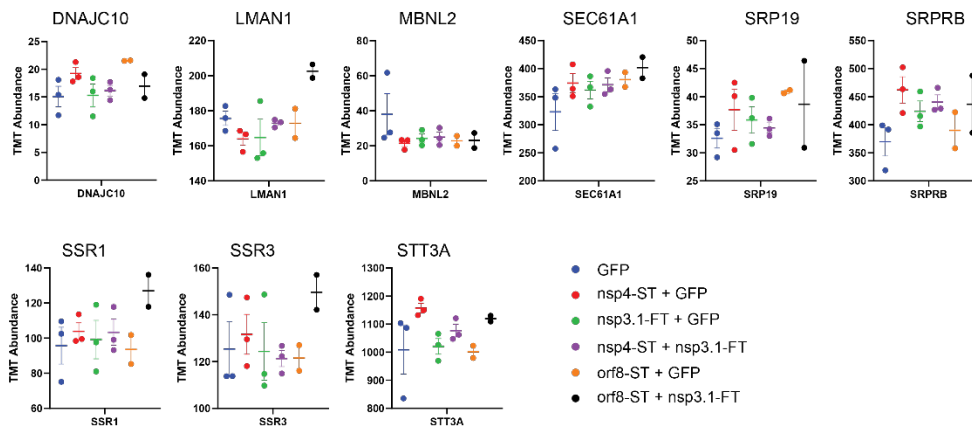

## PERK

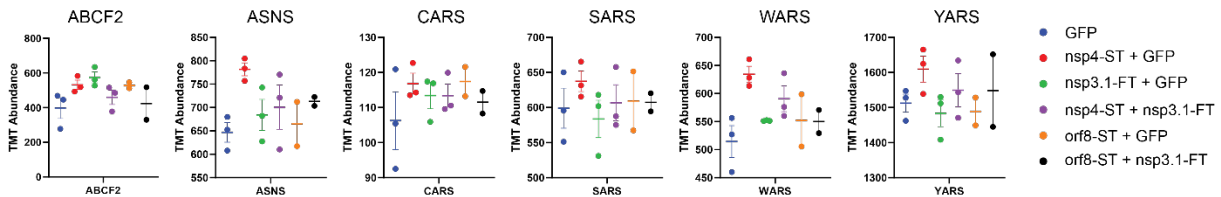

**Figure S6. Normalized TMT abundance levels of individual Unfolded Protein Response (UPR) pathway protein markers in HEK293T cells expressing various viral proteins (corresponding to Fig. 2, 3). Adjusted p-value calculated using a T-test, controlling for FDR by the Benjamini-Hochberg method. \* $p < 0.05$ , \*\* $p < 0.001$**

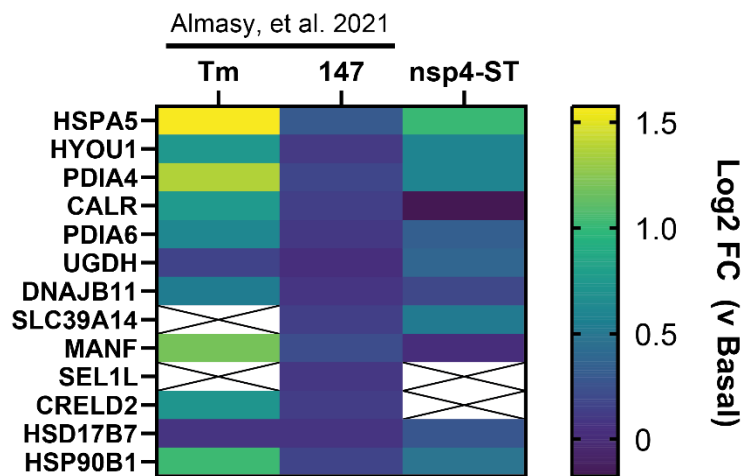

**Figure S7.** ATF6 marker log<sub>2</sub> fold change enrichment over basal conditions in HEK293T cells with treatment of Tm (1  $\mu$ g/mL, 16 h), **147** (10  $\mu$ M, 16 h), or nsp4-ST expression. Samples were quantified by TMTpro-based LC/MS-MS. Basal conditions are Tdtomato transfection with DMSO for drug treatment or GFP transfection for nsp4-ST treatment. Previously published data from Almasy, Davies, Plate *MCP* 2021 is annotated<sup>2</sup>.

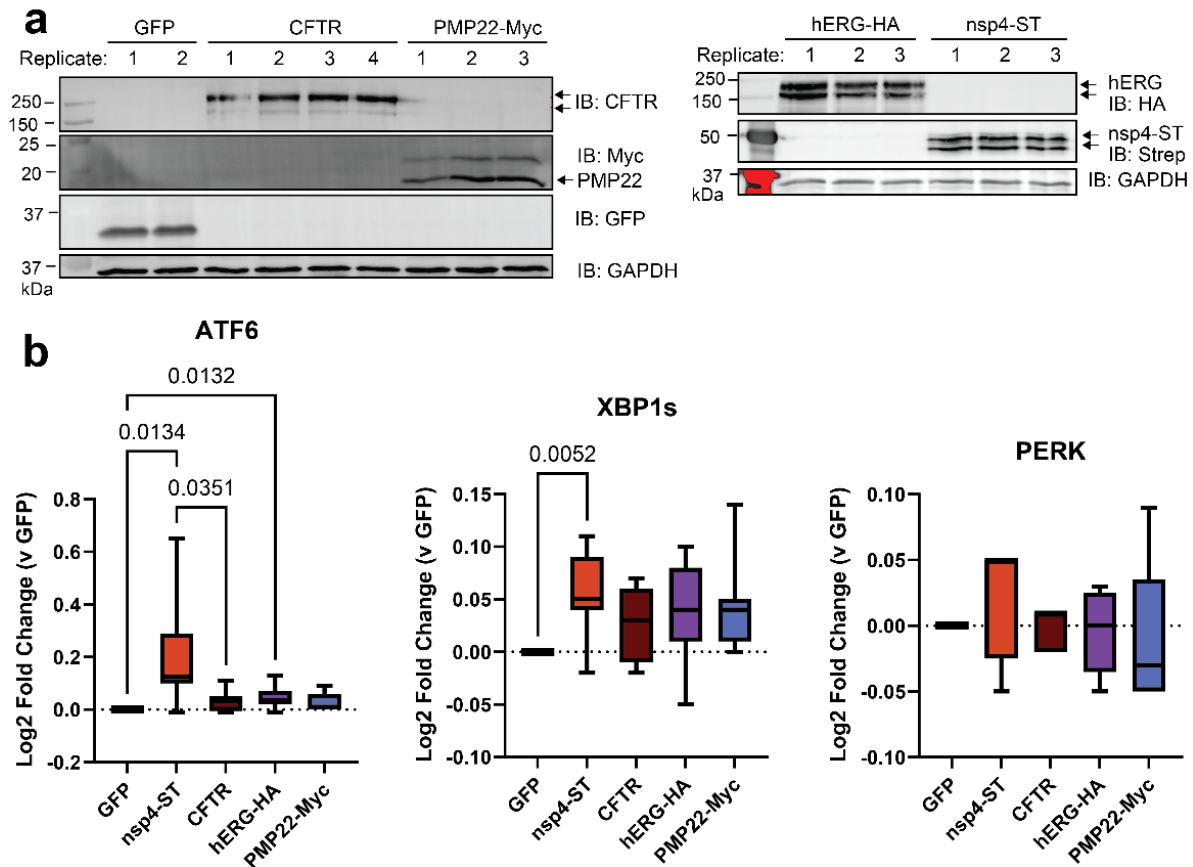

**Figure S8. Effect of various multi-pass transmembrane proteins on the UPR as compared to nsp4.** Nsp4-ST, WT Cystic Fibrosis Transmembrane Conductance Regulator (CFTR), HA-tagged human Ether-a-go-go Related Gene (hERG-HA), or myc-tagged peripheral myelin protein 22 (PMP22-Myc) were expressed in HEK293T cells and harvested 40 h post-transfection.

- a)** Western blot confirmation of protein expression in HEK293T lysates.
- b)** UPR branch reporter protein levels were measured by global proteomics using tandem mass spectrometry (LC/MS-MS) and compared to GFP negative control. One-way ANOVA with Geisser–Greenhouse correction and post-hoc Tukey’s multiple comparison test was used to determine significance,  $p < 0.05$  considered significant, significant  $p$  values shown; 1 MS run,  $n = 3-4$  biological replicates. See **Supplemental Tables S4, S5** for mass spectrometry data set.

## Supplemental Fig. S8 – Full Western blots

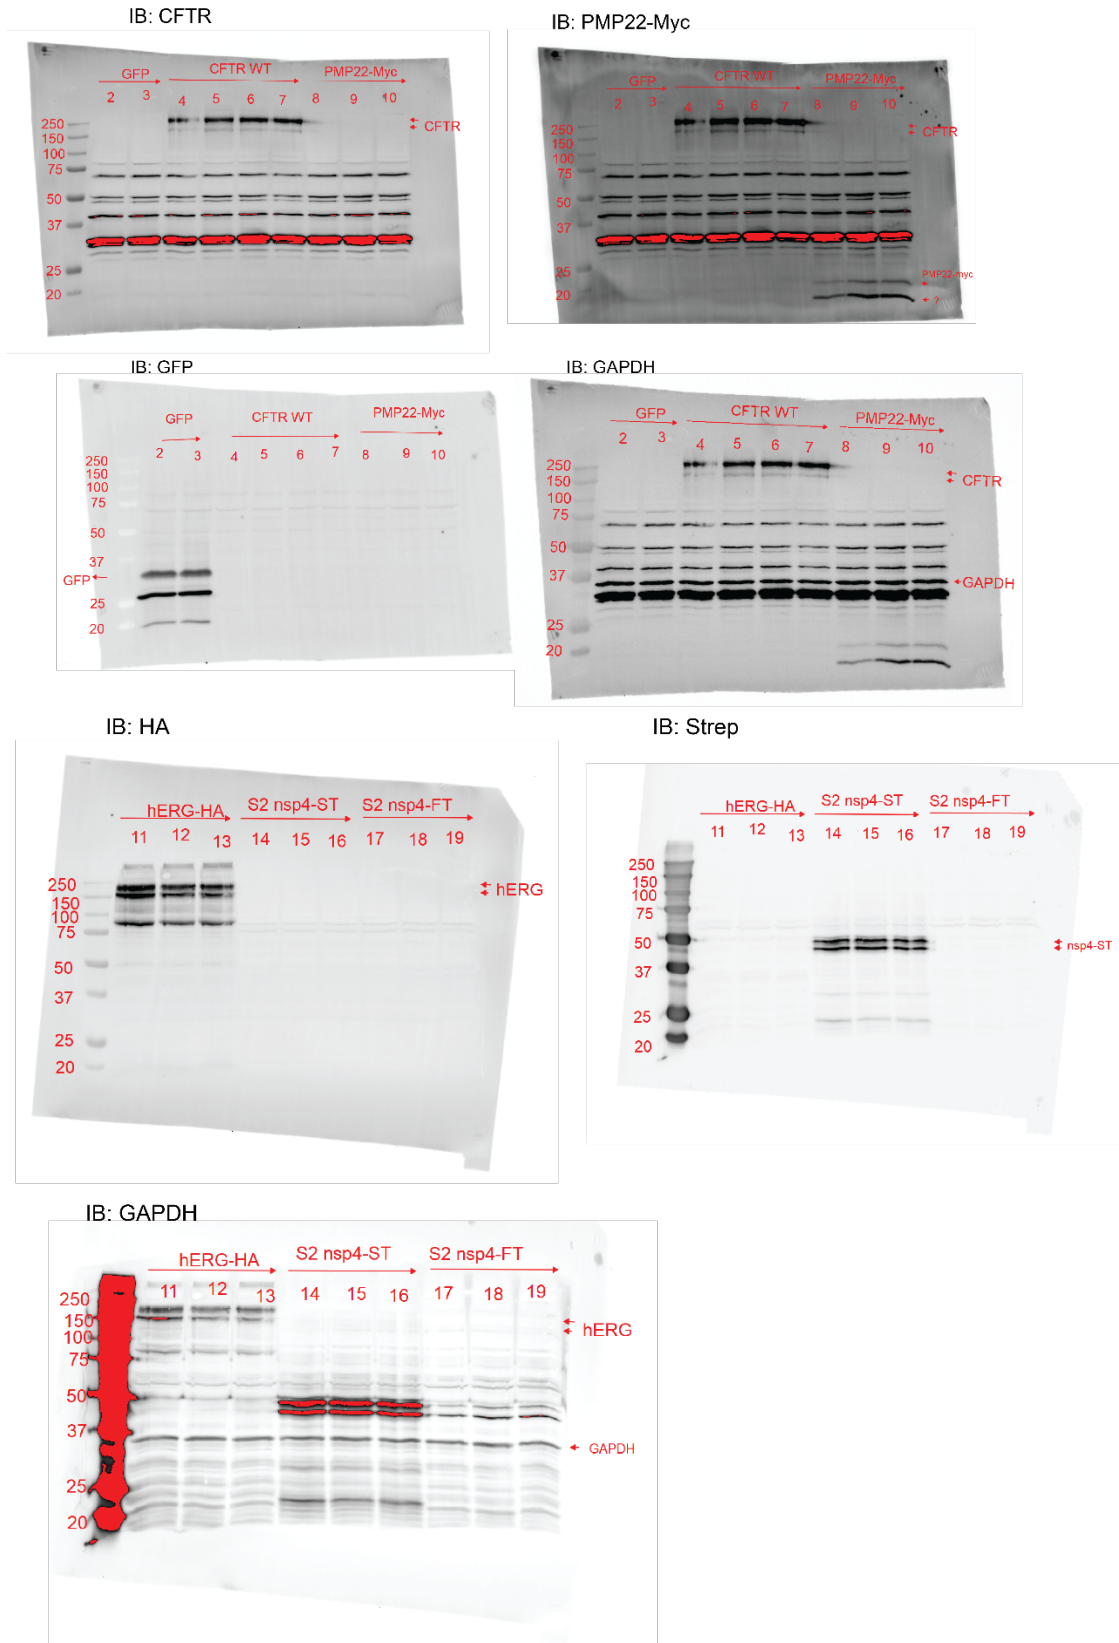

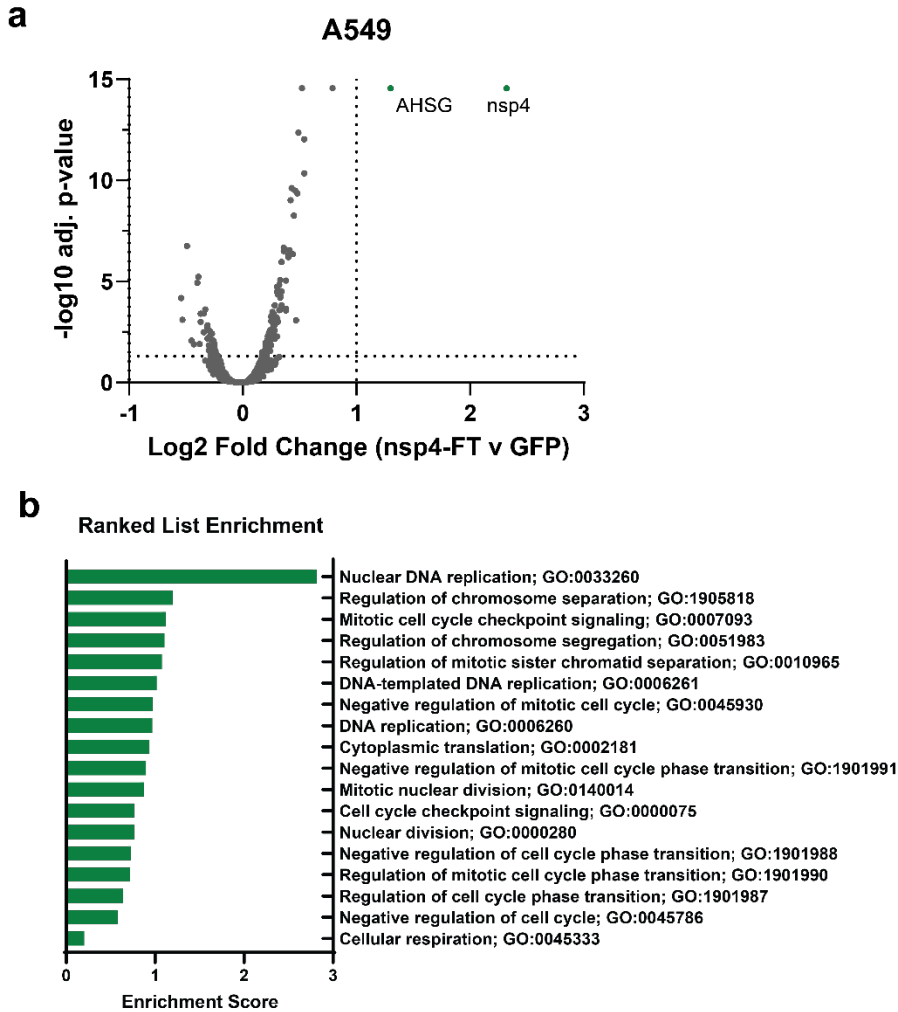

**Figure S9. Global proteome analysis of A549 cells expressing SARS-CoV-2 nsp4-FT vs GFP control (corresponding to Fig. 2).**

- a) Volcano plot of global proteome, with cut-offs indicating Log<sub>2</sub> FC (vs GFP) < -1 or > 1, adjusted p-value < 0.05. Common contaminant proteins were filtered out. Proteins passing cut-offs are annotated. Adjusted p-value calculated using a T-test, controlling for FDR by the Benjamini-Hochberg method. N = 4, 1 MS run.
- b) A ranked list enrichment analysis was applied to identified proteins based on Log<sub>2</sub> Fold Change (nsp4-FT vs GFP) (using the STRING database<sup>1</sup>).

## ATF6

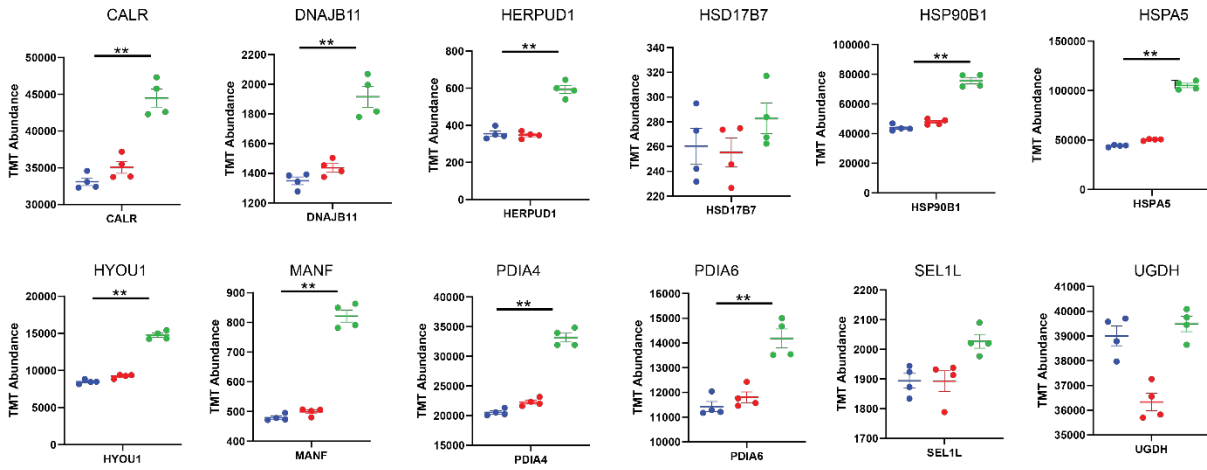

## IRE1/XBP1s

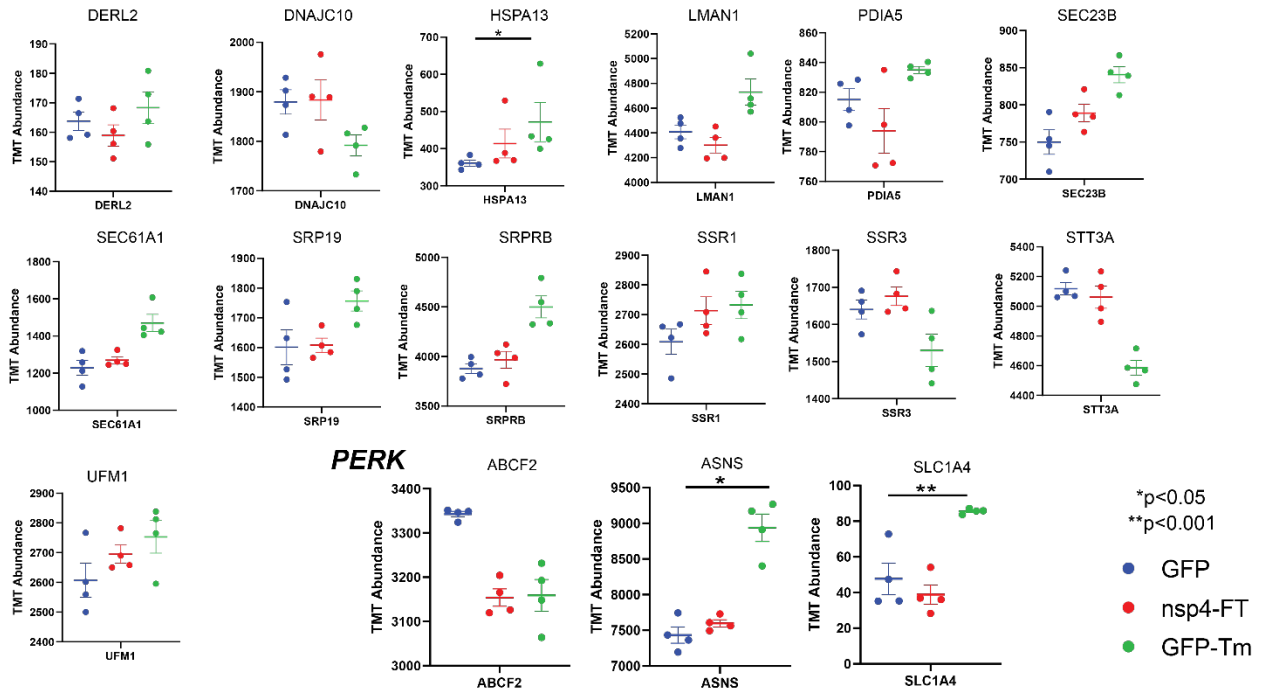

**Figure S10. Normalized TMT abundance levels of individual Unfolded Protein Response (UPR) pathway protein markers in A549 cells expressing nsp4-FT or treated with Tm (corresponding to Fig. 2). Adjusted p-value calculated using a T-test, controlling for FDR by the Benjamini-Hochberg method. \* $p < 0.05$ , \*\* $p < 0.001$**

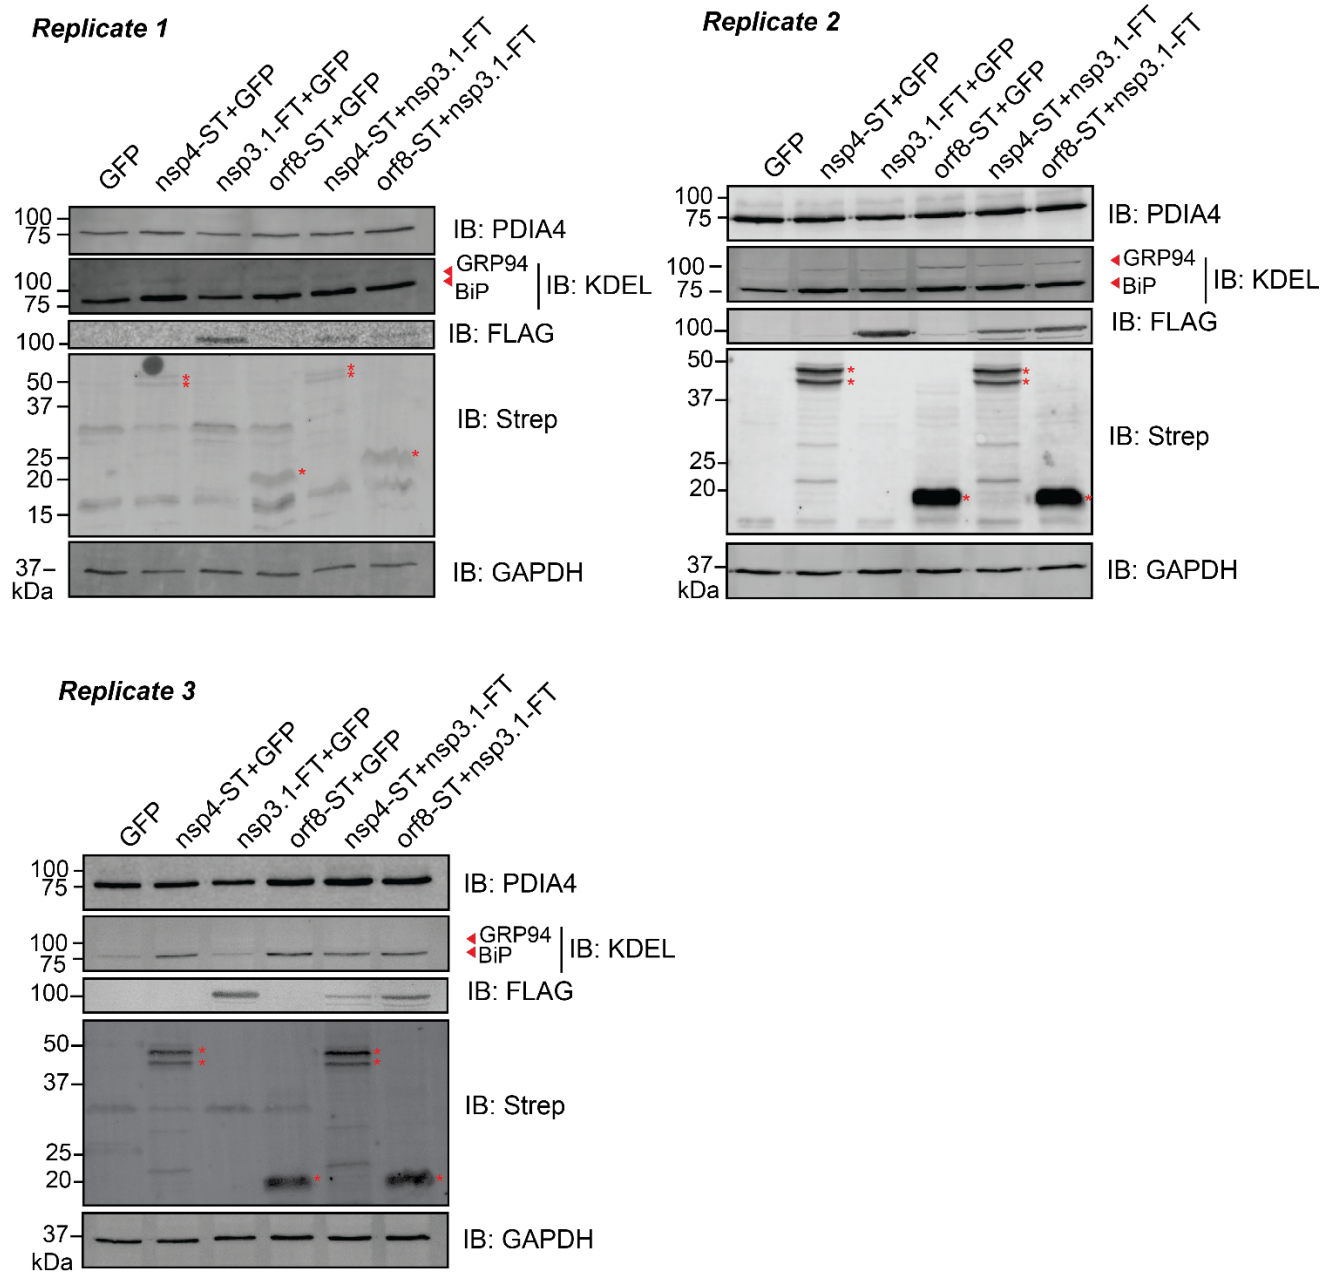

**Figure S11.** Blots quantified for **Fig. 3c**, replicate 2 was shown in **Fig. 3b**. Red asterisks indicate viral proteins. Corresponding full blots are shown below.

**Supplemental Fig. S11 – Replicate 1 Full Western Blots**

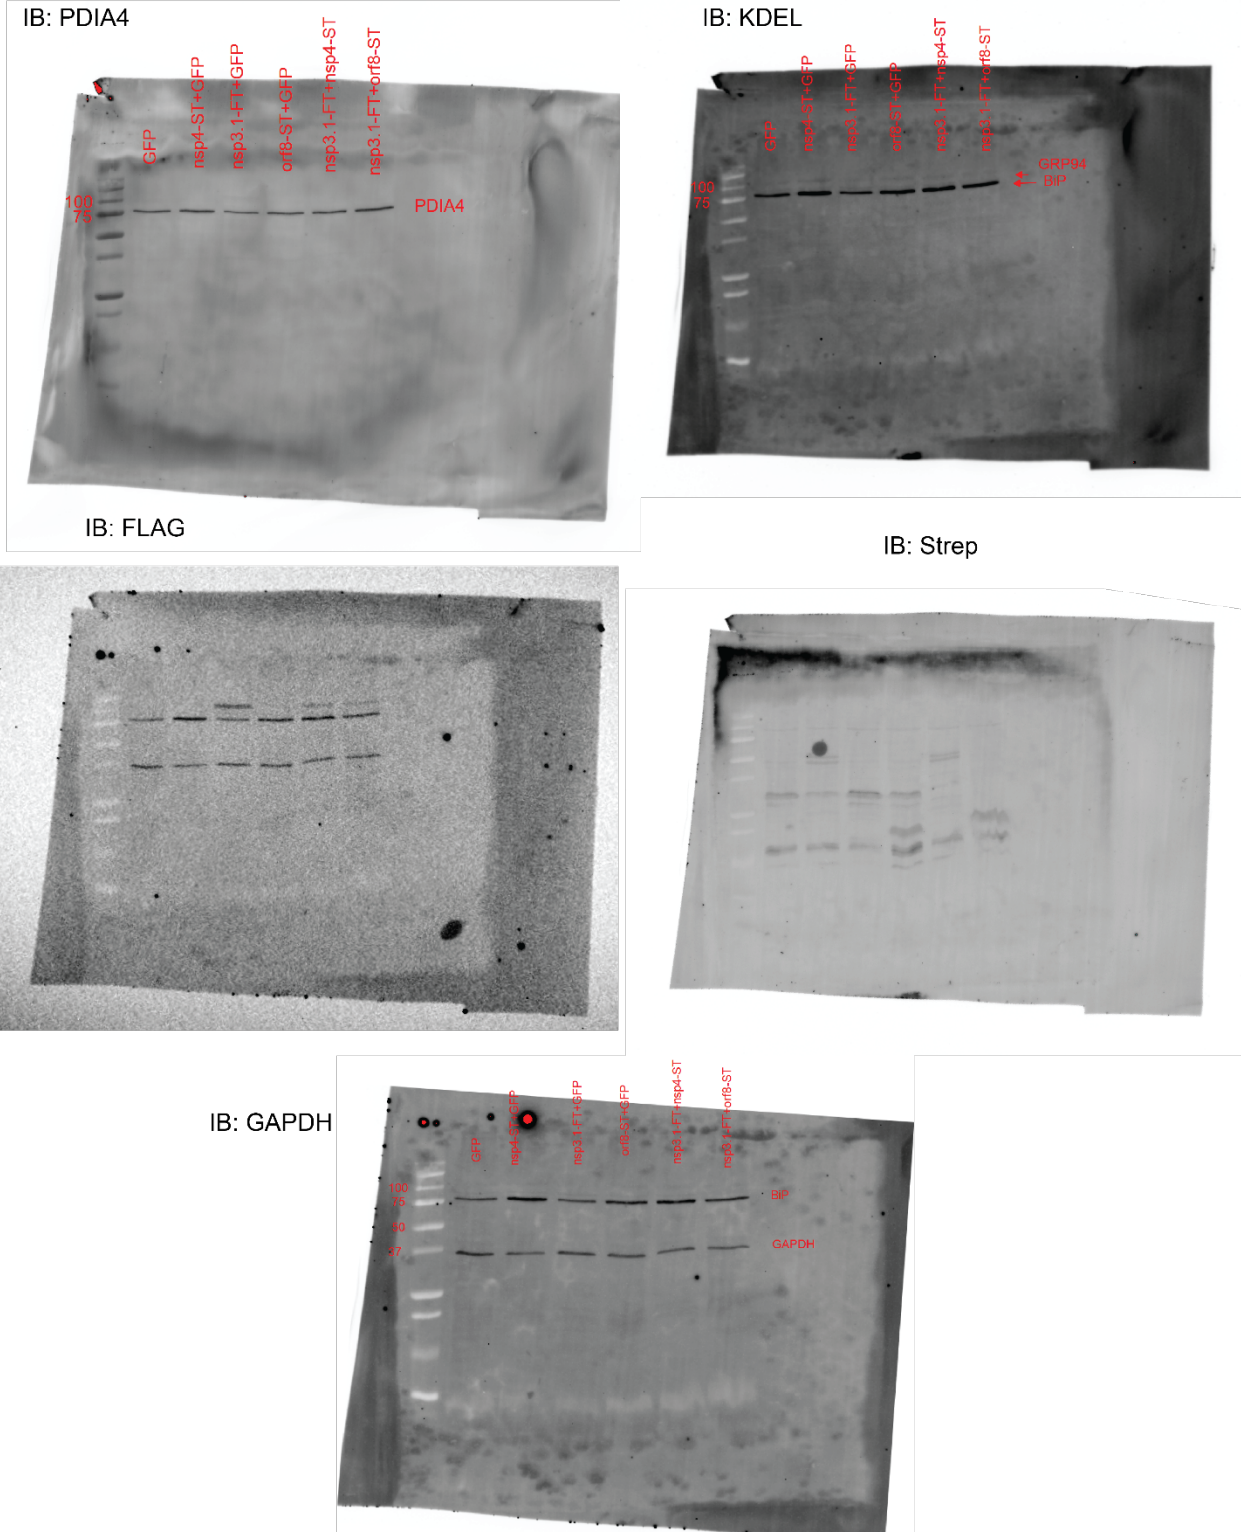



# Supplemental Fig. S11 – Replicate 2 Full Western Blots

IB: PDIA4

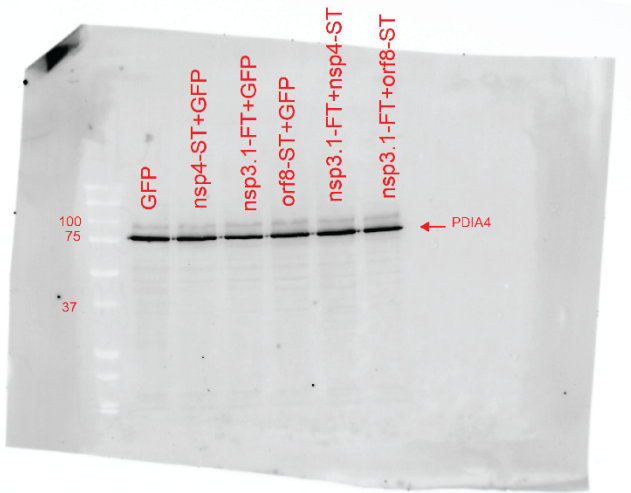

IB: KDEL

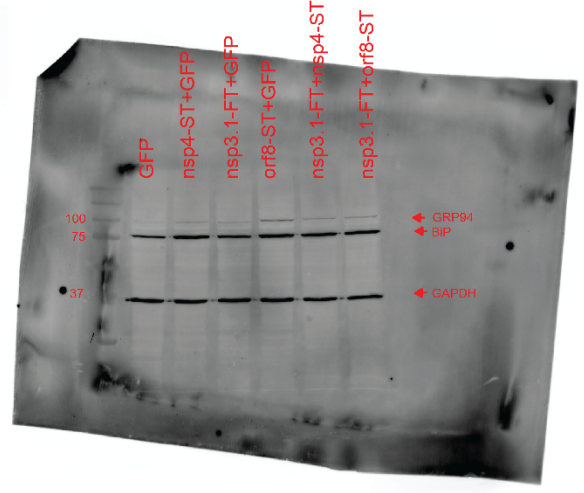

IB: FLAG

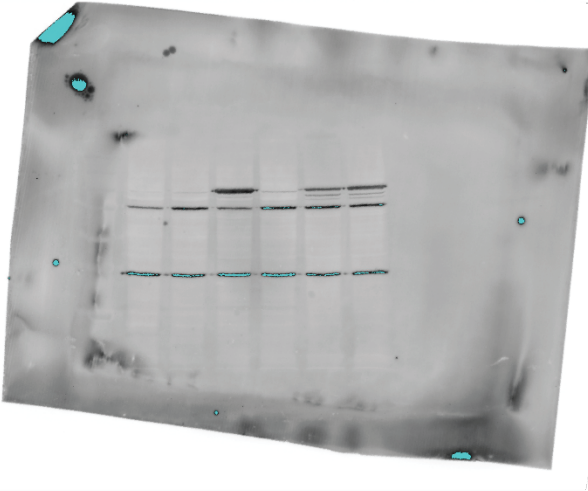

IB: Strep

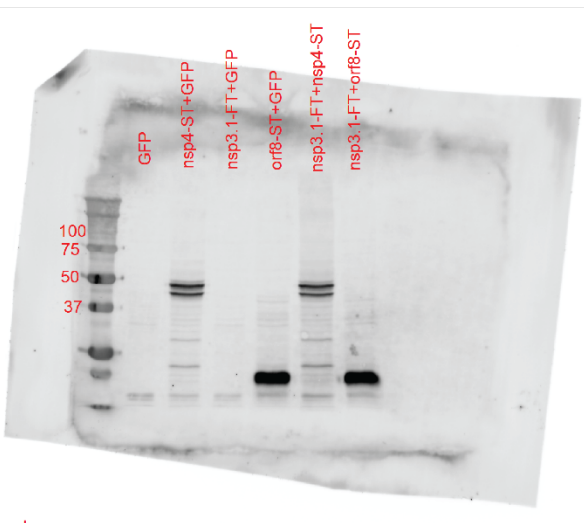

IB: GAPDH

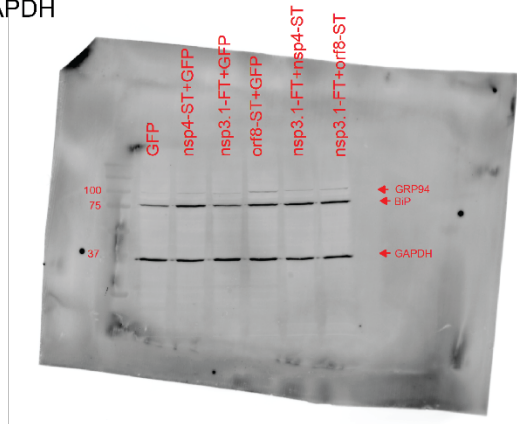

# Supplemental Fig. S11 – Replicate 3 Full Western Blots

IB: KDEL

IB: PDIA4

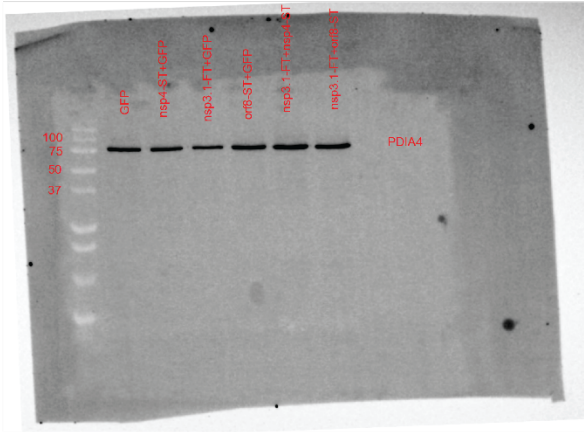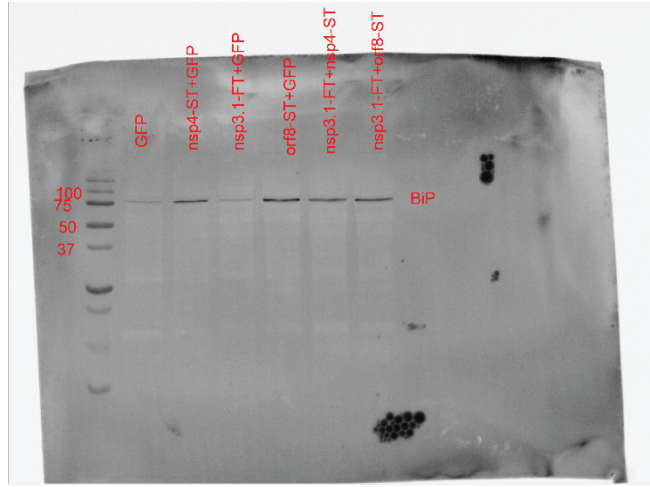

IB: FLAG

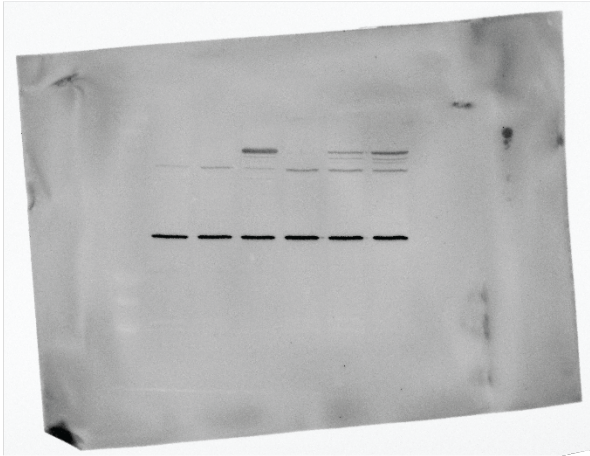

IB: Strep

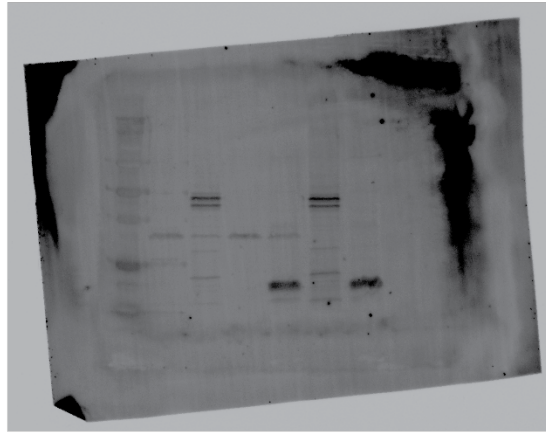

IB: GAPDH

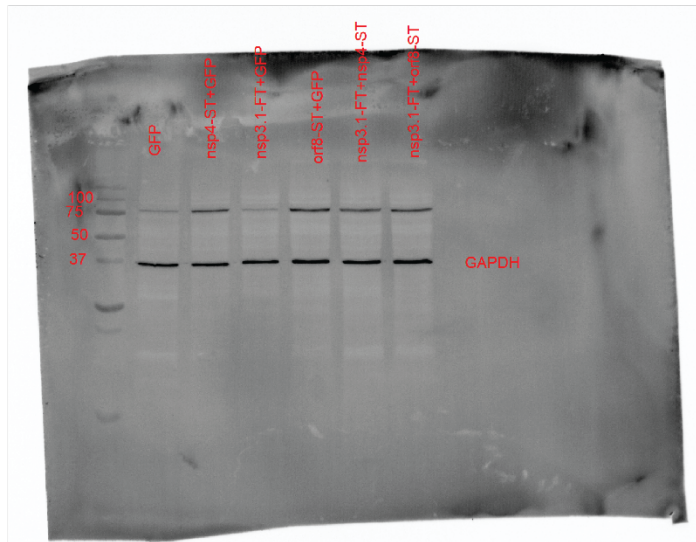

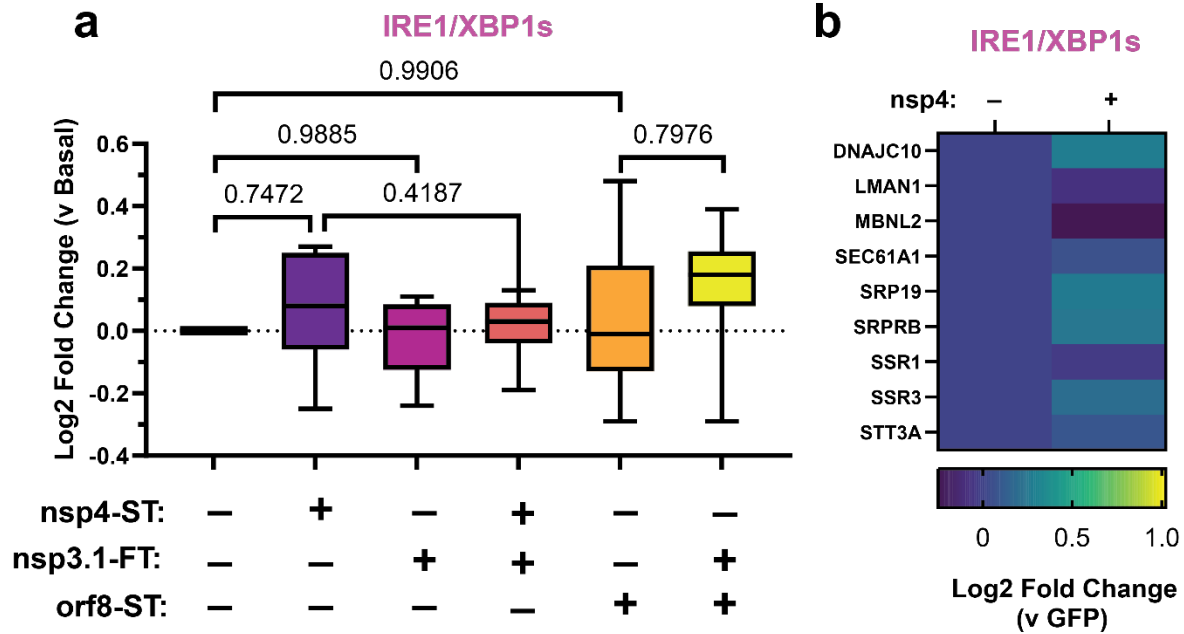

**Figure S12. Upregulation of IRE/XBP1s proteomics protein markers.**

- a) Global proteomics analysis of IRE1/XBP1s protein marker levels in the presence of SARS-CoV-2 nsp4-ST, nsp3.1-FT, orf8-ST, or specified combinations. Box-and-whisker plot shows median, 25<sup>th</sup> and 75<sup>th</sup> quartiles, and minimum and maximum values. One-way ANOVA with Geisser–Greenhouse correction and post-hoc Tukey’s multiple comparison test was used to determine significance,  $p < 0.05$  considered significant; 1 MS run,  $n = 2$ -3 biological replicates. See **Supplemental Tables S2, S3** for mass spectrometry data set.
- b) Individual IRE1/XBP1s pathway protein markers in the absence or presence of nsp4-ST, from (a).

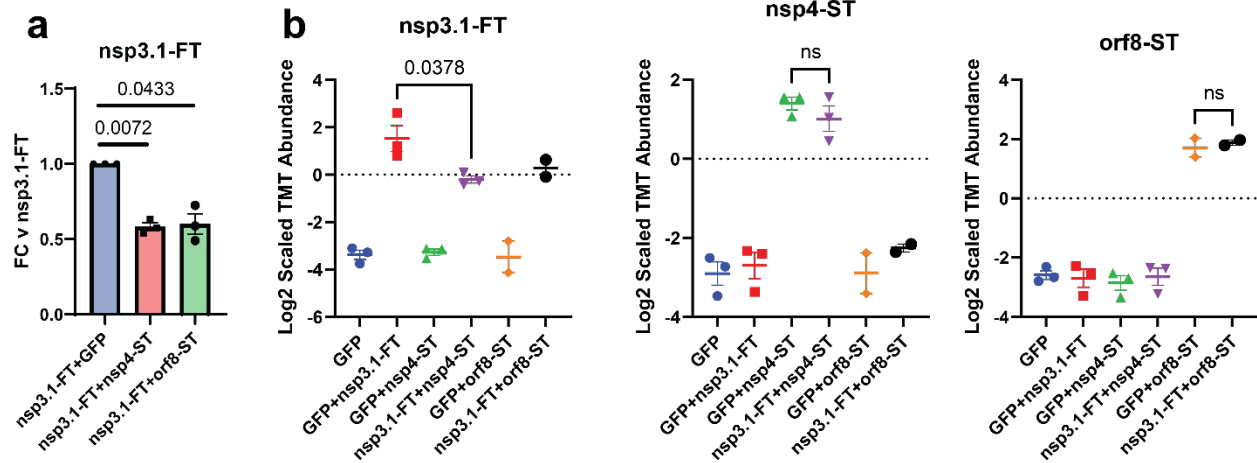

**Figure S13. Viral protein abundance levels.**

- a)** Quantification of the nsp3.1-FT bands shown in **Fig. 3, Supplemental Fig. S11**.  $n = 3$ . T-test for significance between samples,  $p$ -value annotated.
- b)** SARS-CoV-2 nsp3.1-FT, nsp4-ST, and orf8-ST protein abundances (log<sub>2</sub> scaled TMT abundances) in experiment corresponding to **Fig. 3**.  $n = 2-3$  biological replicates, 1 MS run, T-test for significance between indicated samples,  $p$ -value annotated.

## References

- (1) Szklarczyk, D.; Kirsch, R.; Koutrouli, M.; Nastou, K.; Mehryary, F.; Hachilif, R.; Gable, A. L.; Fang, T.; Doncheva, N. T.; Pyysalo, S.; Bork, P.; Jensen, L. J.; von Mering, C. The STRING Database in 2023: Protein–Protein Association Networks and Functional Enrichment Analyses for Any Sequenced Genome of Interest. *Nucleic Acids Res.* **2023**, *51* (D1), D638–D646. <https://doi.org/10.1093/nar/gkac1000>.
- (2) Almasy, K. M.; Davies, J. P.; Plate, L. Comparative Host Interactomes of the SARS-CoV-2 Nonstructural Protein 3 and Human Coronavirus Homologs. *Mol. Cell. Proteomics* **2021**, *20*, 100120. <https://doi.org/10.1016/j.mcpro.2021.100120>.
